# Supplementary material for: Luminescence properties and its red shift of blue-emitting phosphor Na3YSi3O9:Ce3+for UV LED
Source: Royal Society of Chemistry journal article supplement (doi:10.1039/c7ra03813e), 2017-01-01
Supplement: c7ra03813e1.pdf [file c7ra03813e1.pdf]

## Supporting Information

# Luminescence properties and its red shift of blue-emitting phosphor $\text{Na}_3\text{YSi}_3\text{O}_9:\text{Ce}^{3+}$ for UV LED

Fei Wang, <sup>a</sup> Wanrong Wang, <sup>b</sup> Liangliang Zhang, <sup>c</sup> Jinju Zheng, <sup>d</sup> Ye Jin <sup>a\*</sup> Jiahua Zhang <sup>c</sup>

<sup>a</sup> School of Science, Chongqing University of Technology, 69 Hongguang Street, Chongqing 400054, China;

<sup>b</sup> School of Electrical and Electronic Engineering, Chongqing University of Technology, 69 Hongguang Street, Chongqing 400054, China;

<sup>c</sup>State Key Laboratory of Luminescence and Applications, Changchun Institute of Optics, Fine Mechanics and Physics, Chinese Academy of Sciences, 3888 Eastern South Lake Road, Changchun, China

<sup>d</sup> Institute of Materials, Ningbo University of Technology, Ningbo 315016, People's Republic of China.

---

\*Corresponding author: [jinye@cqut.edu.cn](mailto:jinye@cqut.edu.cn);

**Table S1: Atomic coordinates and isotropic displacement parameters of Na<sub>3</sub>YSi<sub>3</sub>O<sub>9</sub>: 0.03Ce<sup>3+</sup> derived from the Rietveld refinement of X-ray diffraction data**

| Atoms | x (Å)      | y(Å)       | z(Å)       | Frac  | U <sub>iso</sub> *100 |
|-------|------------|------------|------------|-------|-----------------------|
| Y1    | 0.3783(7)  | 0.3771(7)  | 0.3834(7)  | 1.000 | 1.267                 |
| Y2    | 0.1227(1)  | 0.1471(7)  | 0.1098(1)  | 1.000 | 1.343                 |
| Y3    | 0.3665(1)  | 0.1096(9)  | 0.8792(0)  | 1.000 | 1.267                 |
| Y4    | 0.1108(6)  | 0.3718(7)  | 0.6242(1)  | 1.000 | 1.089                 |
| Si1   | 0.4922(1)  | 0.4922(1)  | 0.7713(8)  | 1.000 | 0.887                 |
| Si2   | 0.4718(2)  | 0.2268(9)  | -0.0045(3) | 1.000 | 1.013                 |
| Si3   | 0.2627(5)  | 0.3994(9)  | -0.0182(5) | 1.000 | 1.013                 |
| Si4   | 0.0409(4)  | 0.0494(0)  | 0.7474(7)  | 1.000 | 1.140                 |
| Si5   | 0.4882(3)  | 0.2255(6)  | 0.7156(6)  | 1.000 | 1.013                 |
| Si6   | 0.2144(7)  | 0.5198(5)  | 0.2790(8)  | 1.000 | 1.140                 |
| Si7   | 0.2753(2)  | 0.0556(6)  | 0.2128(3)  | 1.000 | 1.013                 |
| Si8   | 0.2187(2)  | 0.2839(5)  | 0.9846(4)  | 1.000 | 1.013                 |
| Si9   | 0.5146(4)  | 0.2738(3)  | 0.5210(4)  | 1.000 | 1.520                 |
| Si10  | 0.2250(8)  | 0.0308(7)  | 0.5148(7)  | 1.000 | 1.393                 |
| Si11  | 0.0190(1)  | 0.2590(2)  | 0.7650(0)  | 1.000 | 1.393                 |
| Si12  | 0.2497(6)  | 0.2260(5)  | 0.5148(8)  | 1.000 | 1.267                 |
| Na1   | 0.1231(0)  | 0.3698(2)  | 0.4130(3)  | 1.000 | 1.773                 |
| Na2   | 0.0953(1)  | 0.1402(4)  | 0.5915(1)  | 1.000 | 2.660                 |
| Na3   | 0.4102(7)  | 0.0968(4)  | 0.6608(3)  | 1.000 | 2.406                 |
| Na4   | 0.4836(1)  | 0.4755(7)  | 1.0621(3)  | 1.000 | 2.026                 |
| Na5   | 0.1675(5)  | 0.0964(7)  | 0.9154(4)  | 1.000 | 2.153                 |
| Na6   | 0.1339(8)  | 0.3909(7)  | 0.8834(3)  | 1.000 | 1.267                 |
| Na7   | 0.1446(0)  | 0.1360(8)  | 0.3318(2)  | 0.970 | 2.533                 |
| Na8   | -0.0520(6) | 0.0325(7)  | 0.4441(9)  | 1.000 | 3.546                 |
| Na9   | 0.1088(3)  | 0.4107(3)  | 0.1493(3)  | 1.000 | 3.166                 |
| Na10  | 0.2762(8)  | 0.2685(0)  | 0.1943(4)  | 1.000 | 2.913                 |
| Na11  | 0.3533(4)  | 0.1563(6)  | 0.3456(9)  | 1.000 | 4.559                 |
| Na12  | 0.3276(4)  | 0.3321(01) | 0.6734(13) | 1.000 | 2.786                 |
| Ce    | 0.1446(0)  | 0.1360(8)  | 0.3318(2)  | 0.030 | 2.533                 |

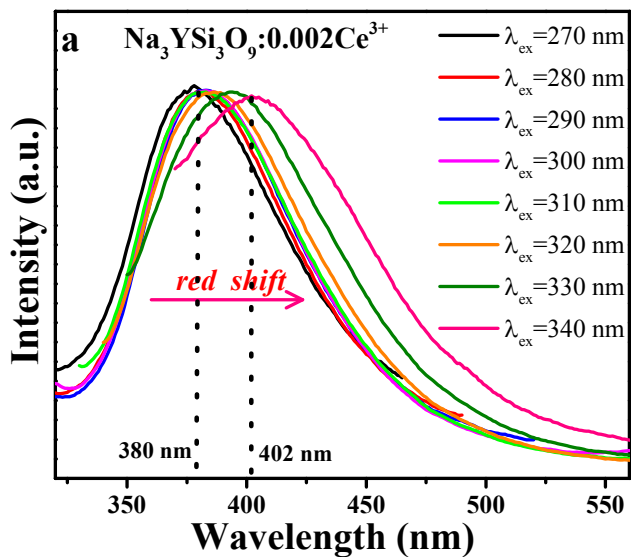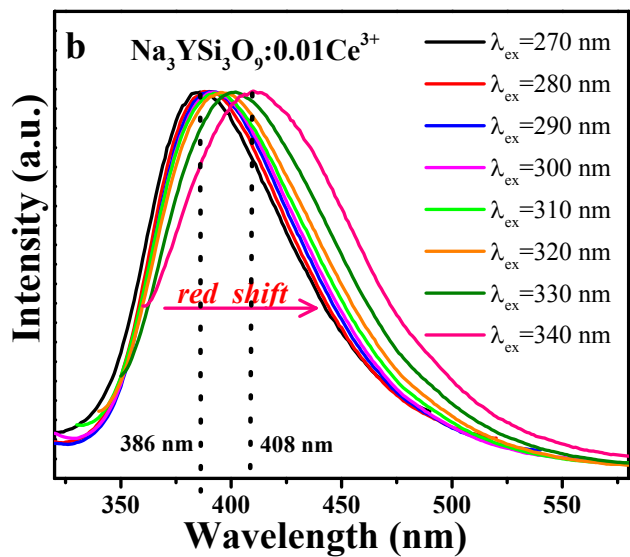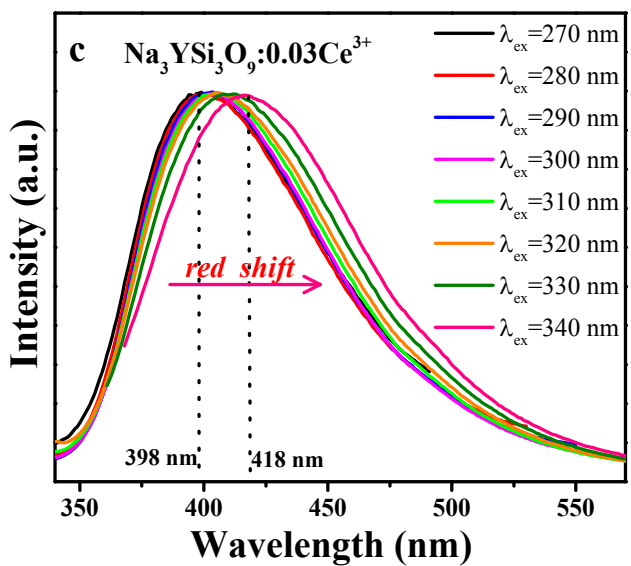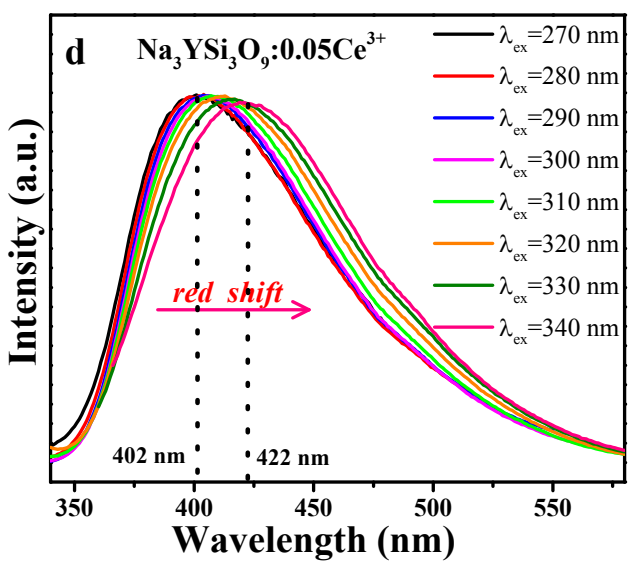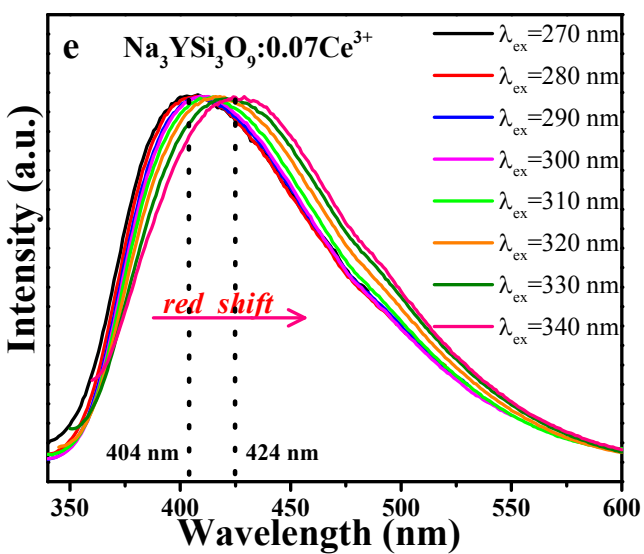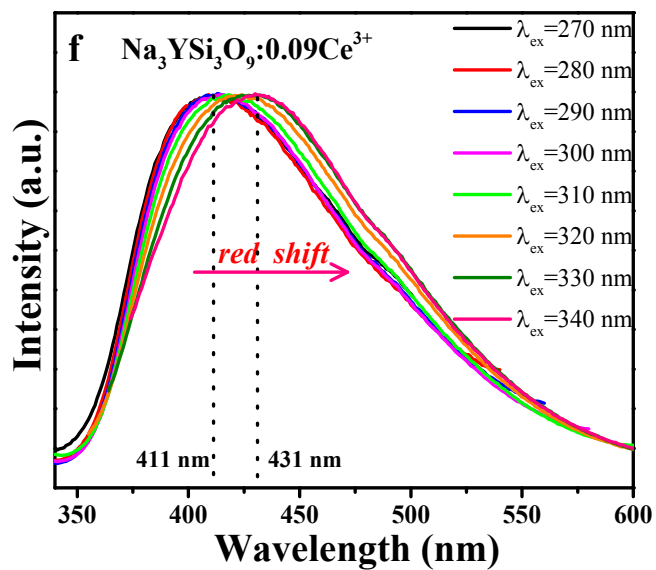

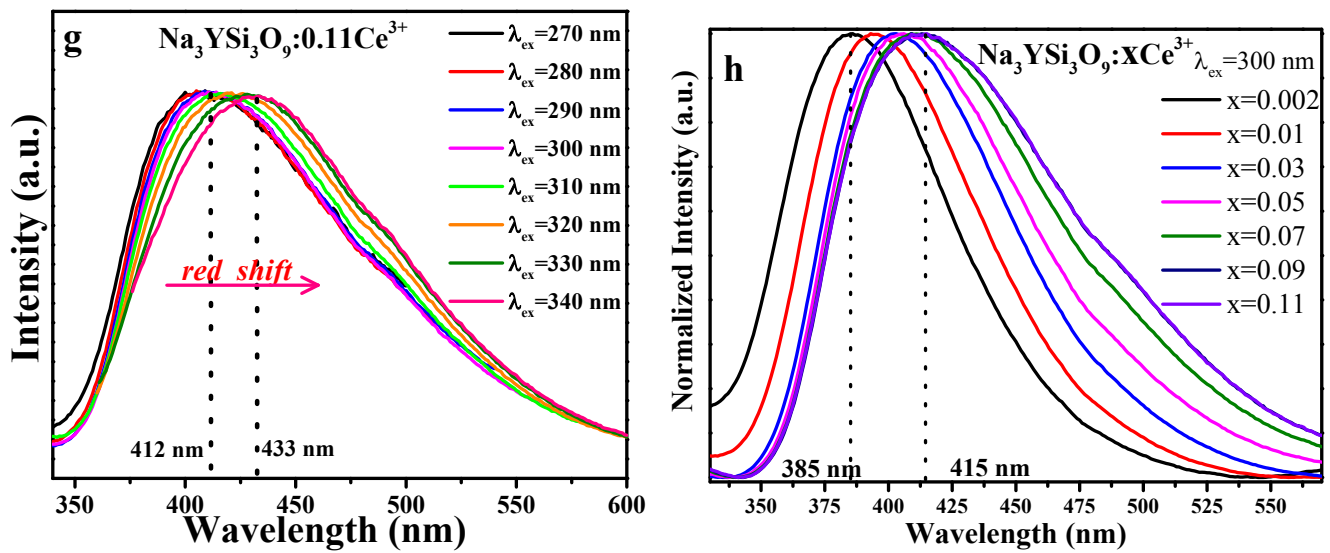

Figure S1: The normalized PL spectra of  $\text{Na}_3\text{YSi}_3\text{O}_9:0.002\text{Ce}^{3+}$  (a),  $\text{Na}_3\text{YSi}_3\text{O}_9:0.01\text{Ce}^{3+}$  (b),  $\text{Na}_3\text{YSi}_3\text{O}_9:0.03\text{Ce}^{3+}$  (c),  $\text{Na}_3\text{YSi}_3\text{O}_9:0.05\text{Ce}^{3+}$  (d),  $\text{Na}_3\text{YSi}_3\text{O}_9:0.07\text{Ce}^{3+}$  (e),  $\text{Na}_3\text{YSi}_3\text{O}_9:0.09\text{Ce}^{3+}$  (f), and  $\text{Na}_3\text{YSi}_3\text{O}_9:0.11\text{Ce}^{3+}$  (g) excited with different excitation wavelength (270 nm-340 nm); (h) The normalized PL spectra of  $\text{Na}_3\text{YSi}_3\text{O}_9:x\text{Ce}^{3+}$  excited under 300 nm.

**Table S2.** Emission peak values with different excitation wavelength for Na<sub>3</sub>YSi<sub>3</sub>O<sub>9</sub>: xCe<sup>3+</sup>.

| excitation<br>emission | 270<br>(nm) | 280<br>(nm) | 290<br>(nm) | 300<br>(nm) | 310<br>(nm) | 320<br>(nm) | 330<br>(nm) | 340<br>(nm) |
|------------------------|-------------|-------------|-------------|-------------|-------------|-------------|-------------|-------------|
| x=0.002 (nm)           | 380         | 382         | 384         | 385         | 385         | 387         | 394         | 402         |
| x=0.01 (nm)            | 386         | 390         | 392         | 393         | 395         | 397         | 401         | 408         |
| x=0.03 (nm)            | 398         | 400         | 402         | 402         | 405         | 406         | 412         | 418         |
| x=0.05 (nm)            | 402         | 403         | 405         | 406         | 409         | 412         | 417         | 422         |
| x=0.07 (nm)            | 404         | 406         | 408         | 412         | 414         | 417         | 421         | 424         |
| x=0.09 (nm)            | 411         | 412         | 413         | 414         | 418         | 423         | 428         | 431         |
| x=0.11 (nm)            | 412         | 413         | 415         | 415         | 418         | 424         | 429         | 433         |
